# Supplementary material for: Solid state structural transformation of bromide coordination polymer to chloride by anion replacement; new precursors for preparation of PbBr2 and PbCl2 nanoparticles
Source: Royal Society of Chemistry journal article supplement (doi:10.1039/c4ra01579g), 2014-01-01
Supplement: c4ra01579g1.pdf [file c4ra01579g1.pdf]

**Electronic Supplementary Information for MS:**

**Solid State Structural Transformation of Bromide Coordination  
Polymer to Chloride by Anion Replacement; New Precursors for  
Preparation of PbBr<sub>2</sub> and PbCl<sub>2</sub> Nanoparticles**

**Lida Hashemi, Ali Morsali\***

Department of Chemistry, Faculty of Sciences, Tarbiat Modares University, P.O. Box 14115-  
175, Tehran, Islamic Republic of Iran

## ‡ Experimental section:

### *Synthesis of coordination polymers 1, 2 with branched tube method:*

Single crystals of compound **1** suitable for X-ray diffraction were prepared by a thermal gradient method in branched tube. The ligand 4-bpdb (1 mmol, 0.210g), lead(II) nitrate (0.331g, 1mmol) and KBr (2 mmol 0.119g) were placed in the main arm of a branched tube. Methanol was carefully added to fill both arms. The tube was sealed and the ligand-containing arm immersed in an oil bath at 60°C while the other arm was kept at ambient temperature. After 3-4 days, crystals deposited in the cooler arm that were isolated, filtered off and dried. M.P.=228°C. Found; C, 24.89; H, 1.78; N, 9.72%, calculated for  $C_{12}H_{10}Br_2N_4Pb$ ; C, 24.94; H, 1.73; N, 9.70%. IR ( $cm^{-1}$ ) selected bonds:  $\nu = 530(w)$ , 815(m), 1055(m), 1205(m), 1315(m), 1410(s), 1543(s) and 1595(m) .

Single crystals of compound **2** suitable for X-ray diffraction were prepared by a thermal gradient method in branched tube. The ligand 4-bpdb (1 mmol, 0.210g), lead(II) nitrate (0.331g, 1mmol) and KCl (2 mmol 0.150g) were placed in the main arm of a branched tube. Methanol was carefully added to fill both arms. The tube was sealed and the ligand-containing arm immersed in an oil bath at 60°C while the other arm was kept at ambient temperature. After 4 days, crystals deposited in the cooler arm that were isolated, filtered off and dried. M.P.>300°C. Found; C, 29.51; H, 2.02; N, 11.46%, calculated for  $C_{12}H_{10}Cl_2N_4Pb$ ; C, 29.49; H, 2.05; N, 11.47%. IR ( $cm^{-1}$ ) selected bonds:  $\nu = 513(w)$ , 819(m), 1000(m), 1203(m), 1304(m), 1379(s), 1548(s) and 1601(m) .

### *Synthesis of coordination polymers 1, 2 with mechanochemical maner:*

In mechanochemical manner compound **1** could be synthesized from grinding of row materials for 20 minutes in an agate mortar. Compound **2** could be synthesized from grinding of 1mmol of compound **1** with 2 mmol of KCl and these processes could be reversible by using of 2 mmol KBr for converting compound **2** to **1**. Compound **2** could be synthesized from grinding of row materials for 20 minutes in an agate mortar too. For purification of coordination polymers with mechanochemical maner after each stage washing with water, thrice time, has been done until extra KBr, KCl or  $KNO_3$  removed.

Elemental analysis data for compounds **1** and **2** prepared with mechanochemical method:

**Compound 1:** C, 24.91; H, 1.75; N, 9.73    **Compound 2:** C, 29.50; H, 2.04; N, 11.48%

***Synthesis of PbBr<sub>2</sub> and PbCl<sub>2</sub> nanoparticles by thermal decomposition of coordination polymers 1 and 2, respectively, at oleic acid as a surfactant:***

Precursors **1** and **2** (0.1 mmol) were dispersed in oleic acid (1.58 ml) to form homogenous emulsion solutions. These solutions were degassed for 20 min and then heated to 180 °C for 2 h. At the end of the reaction, black precipitates for precursor **1** and **2** were formed. A small amount of toluene and a large excess of EtOH were added to the all of three reaction solutions and PbBr<sub>2</sub> and PbCl<sub>2</sub> nanoparticles were separated by centrifugation for the precursors **1** and **2**, respectively. The solids were washed with EtOH and dried under air atmosphere (yield: 63 and 64% for PbBr<sub>2</sub> and PbCl<sub>2</sub> respectively).

PbBr<sub>2</sub> with the lattice parameters ( $a = 8.062 \text{ \AA}$ ,  $b = 9.5393 \text{ \AA}$ ,  $c = 4.7348 \text{ \AA}$ , S.G. = Pnam (62) and  $z = 4$ ) which are in JCPDS card file No. 31-0679.

PbCl<sub>2</sub> with the lattice parameters ( $a = 7.6222(5) \text{ \AA}$ ,  $b = 9.0448(7) \text{ \AA}$ ,  $c = 4.5348(4) \text{ \AA}$ , S.G. = Pnam (62) and  $z = 4$ ) which are in JCPDS card file No. 26-1150.

**Table S1** Crystal data and structure refinements for compound **1** and **2**.

| Identification code                          | <b>[Pb(4-bpdb)Br<sub>2</sub>]<sub>n</sub> (1)</b>                 | <b>[Pb(4-bpdb)Cl<sub>2</sub>]<sub>n</sub> (2)</b>                 |
|----------------------------------------------|-------------------------------------------------------------------|-------------------------------------------------------------------|
| Empirical formula                            | C <sub>12</sub> H <sub>10</sub> Br <sub>2</sub> N <sub>4</sub> Pb | C <sub>12</sub> H <sub>10</sub> Cl <sub>2</sub> N <sub>4</sub> Pb |
| Formula weight                               | 577.25                                                            | 488.33                                                            |
| Temperature(K)                               | 100(2)                                                            | 100(2)                                                            |
| Wavelength                                   | 0.71073                                                           | 0.71073                                                           |
| Crystal system                               | Triclinic                                                         | Triclinic                                                         |
| Space group                                  | P $\bar{1}$                                                       | P $\bar{1}$                                                       |
| Unit cell dimensions                         | a = 4.1774(5) Å                                                   | a = 4.0721(11) Å                                                  |
|                                              | b = 9.2283(12) Å                                                  | b = 8.784(2) Å                                                    |
|                                              | c = 10.8275(14) Å                                                 | c = 10.982(3) Å                                                   |
|                                              | $\alpha$ = 108.661(2)°                                            | $\alpha$ = 110.278(5)°                                            |
|                                              | $\beta$ = 95.978(2)°                                              | $\beta$ = 95.380(9)°                                              |
|                                              | $\gamma$ = 91.459(2)°                                             | $\gamma$ = 90.369(10)°                                            |
| Volume                                       | 392.54(9) Å <sup>3</sup>                                          | 366.53(17) Å <sup>3</sup>                                         |
| Z                                            | 1                                                                 | 1                                                                 |
| Density (calculated)                         | 2.442 Mg/m <sup>3</sup>                                           | 2.212 Mg/m <sup>3</sup>                                           |
| F(000)                                       | 262                                                               | 226                                                               |
| Theta range for data collection              | 2.33 to 30.00°                                                    | 1.99 to 30.00°                                                    |
| Index ranges                                 | -5 ≤ h ≤ 5                                                        | -5 ≤ h ≤ 4                                                        |
|                                              | -12 ≤ k ≤ 12                                                      | -12 ≤ k ≤ 12                                                      |
|                                              | -15 ≤ l ≤ 15                                                      | -15 ≤ l ≤ 15                                                      |
| Reflections collected                        | 6789                                                              | 4551                                                              |
| Independent reflections                      | 2255 [R(int) = 0.0244]                                            | 2110 [R(int) = 0.0327]                                            |
| Absorption correction                        | Semi-empirical from equivalents                                   | Semi-empirical from equivalents                                   |
| Refinement method                            | Full-matrix least-squares on F <sup>2</sup>                       | Full-matrix least-squares on F <sup>2</sup>                       |
| Data / restraints / parameters               | 2255 / 0 / 88                                                     | 2110 / 0 / 88                                                     |
| Goodness-of-fit on F <sup>2</sup>            | 1.004                                                             | 1.014                                                             |
| Final R indices [ <i>I</i> > 2σ( <i>I</i> )] | R <sub>1</sub> = 0.0139, wR <sub>2</sub> = 0.0327                 | R <sub>1</sub> = 0.0254, wR <sub>2</sub> = 0.0539                 |
| R Indices (all data)                         | R <sub>1</sub> = 0.0139, wR <sub>2</sub> = 0.0327                 | R <sub>1</sub> = 0.0254, wR <sub>2</sub> = 0.0539                 |

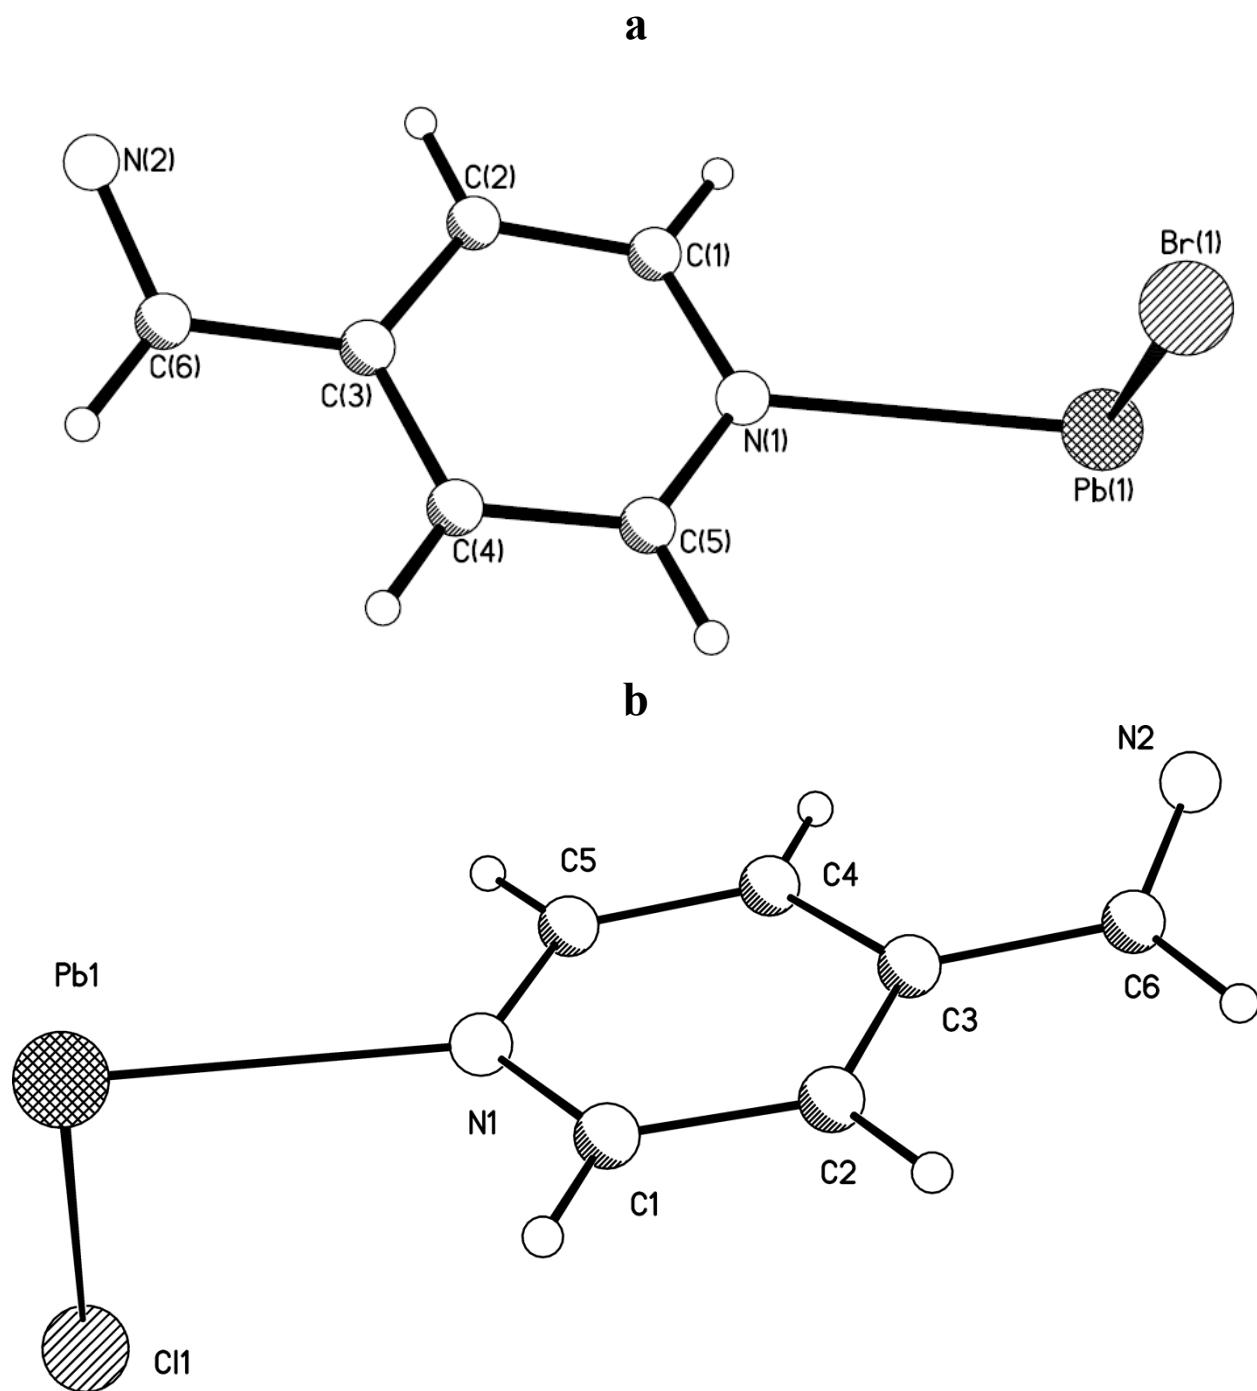

**Fig. S1** Molecular view of independent part of unit cell (a) compound  $[\text{Pb}(\text{4-bpdh})(\text{Br})_2]_n$  (**1**)  
(b) compound  $[\text{Pb}(\text{4-bpdh})(\text{Cl})_2]_n$  (**2**).

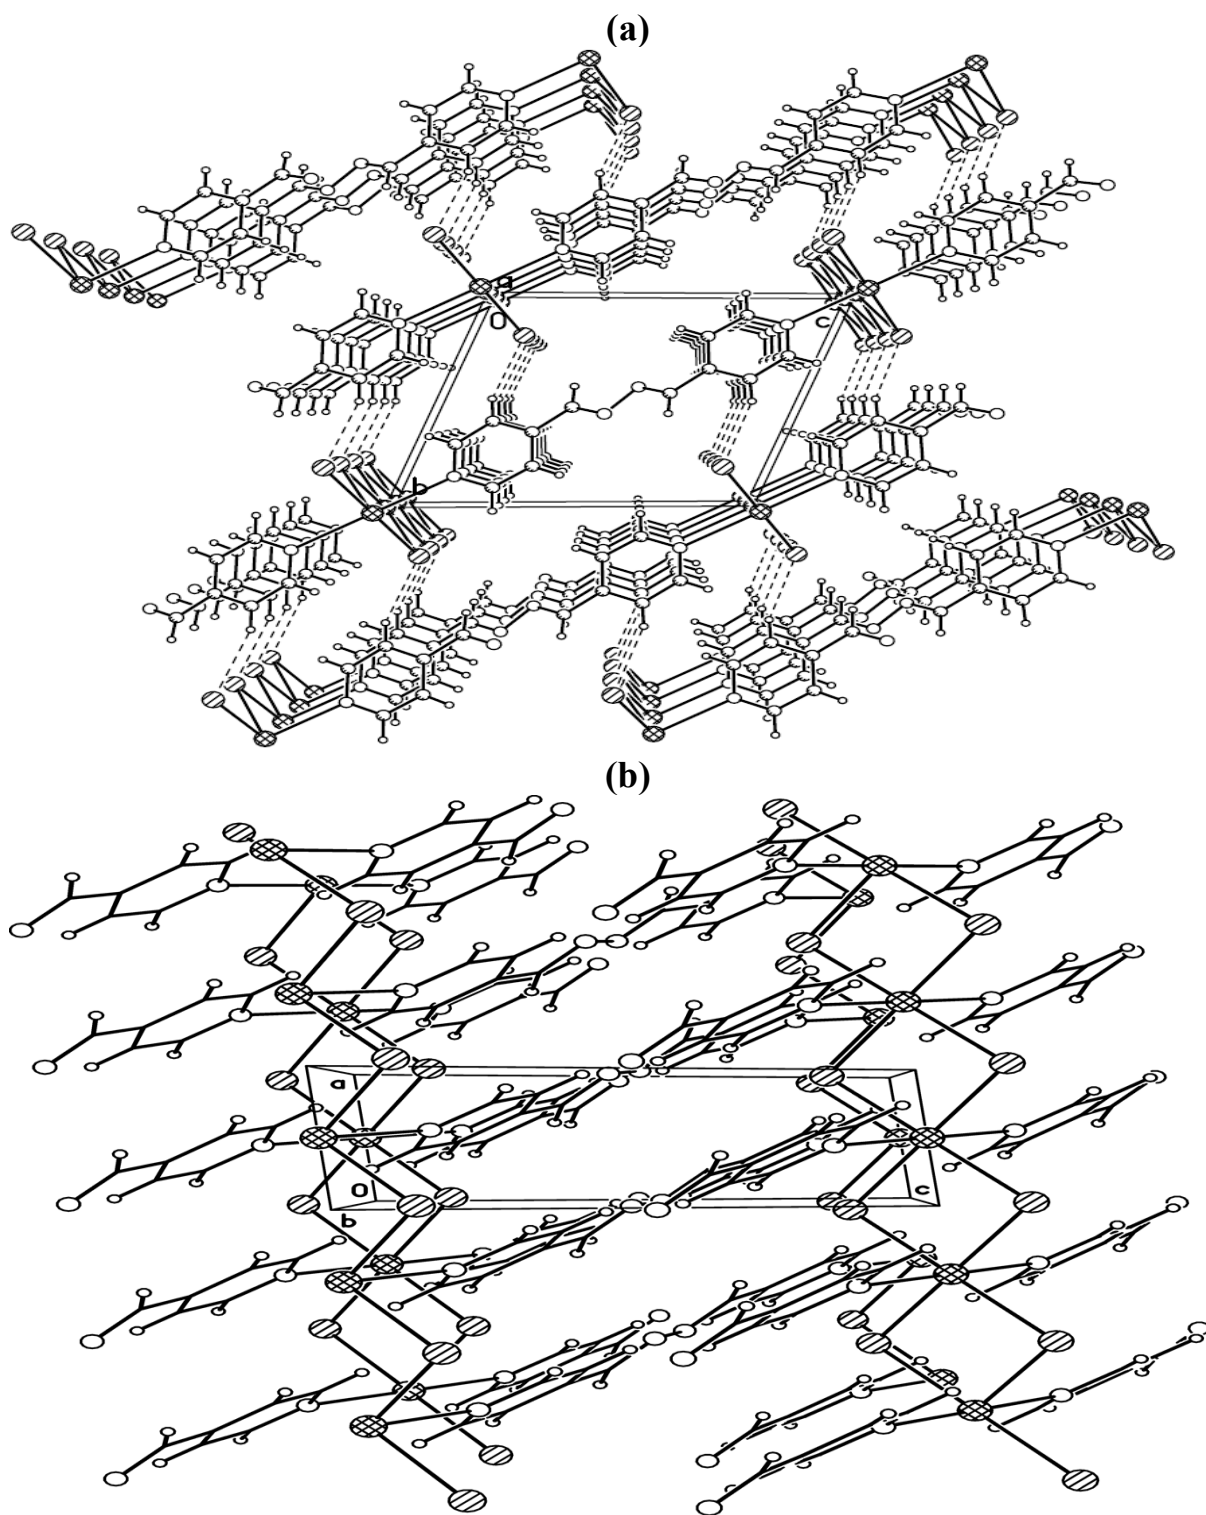

**Fig. S2** Fragment of crystal packing (a) compound  $[\text{Pb}(\text{4-bpdh})(\text{Br})_2]_n$  (**1**) (b) compound  $[\text{Pb}(\text{4-bpdh})(\text{Cl})_2]_n$  (**2**).

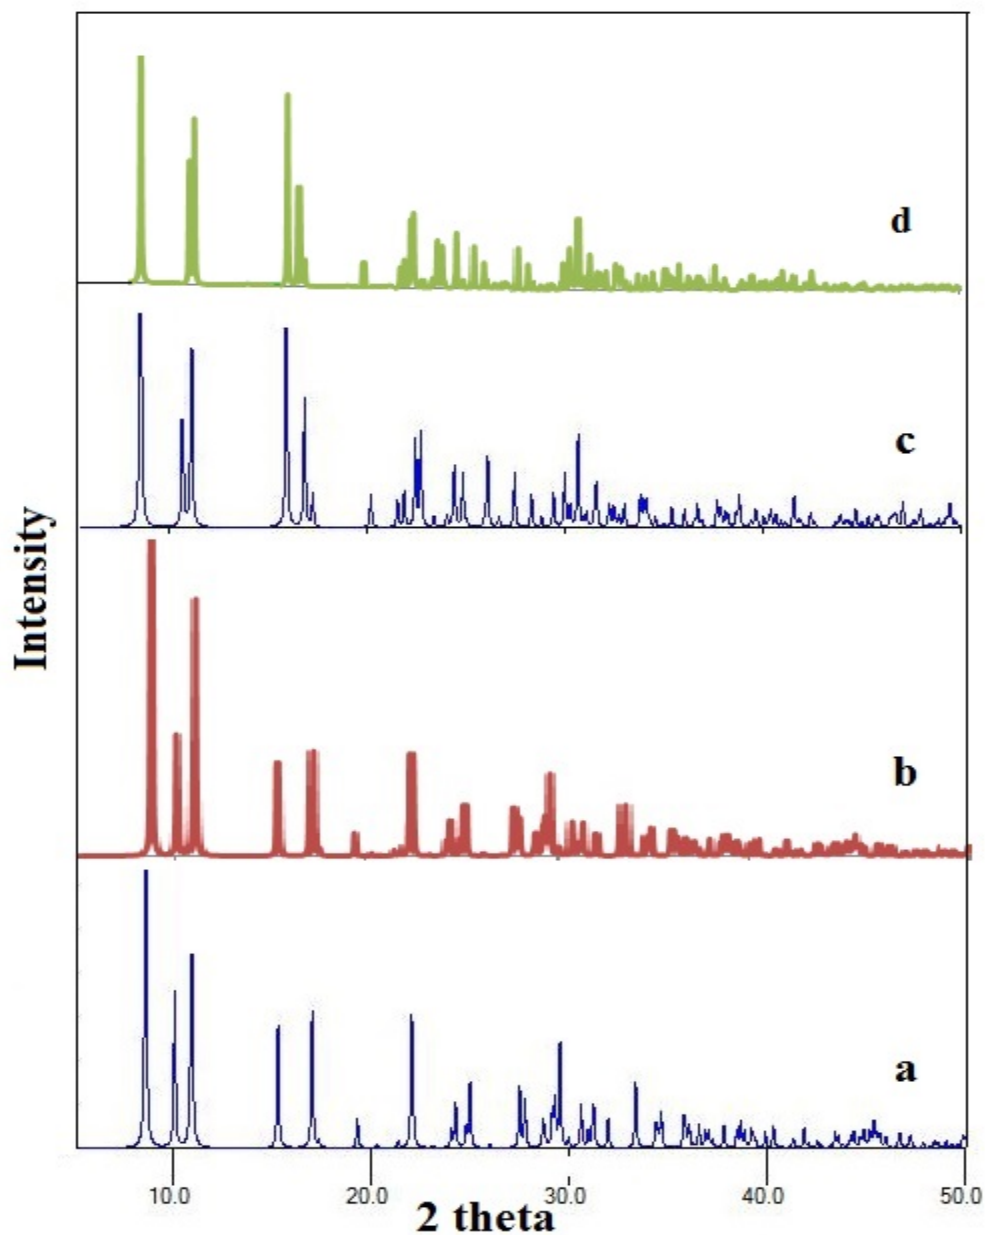

**Fig. S3** The XRD patterns of (a) simulated from single crystal X-ray data of compound **1**, (b) bulk materials obtained by solid state anion-replacement of compound **2** with 2 mmol KBr, (c) simulated from single crystal X-ray data of compound **2**, (d) bulk materials obtained by solid state anion-replacement of compound **1** with 2 mmol KCl.

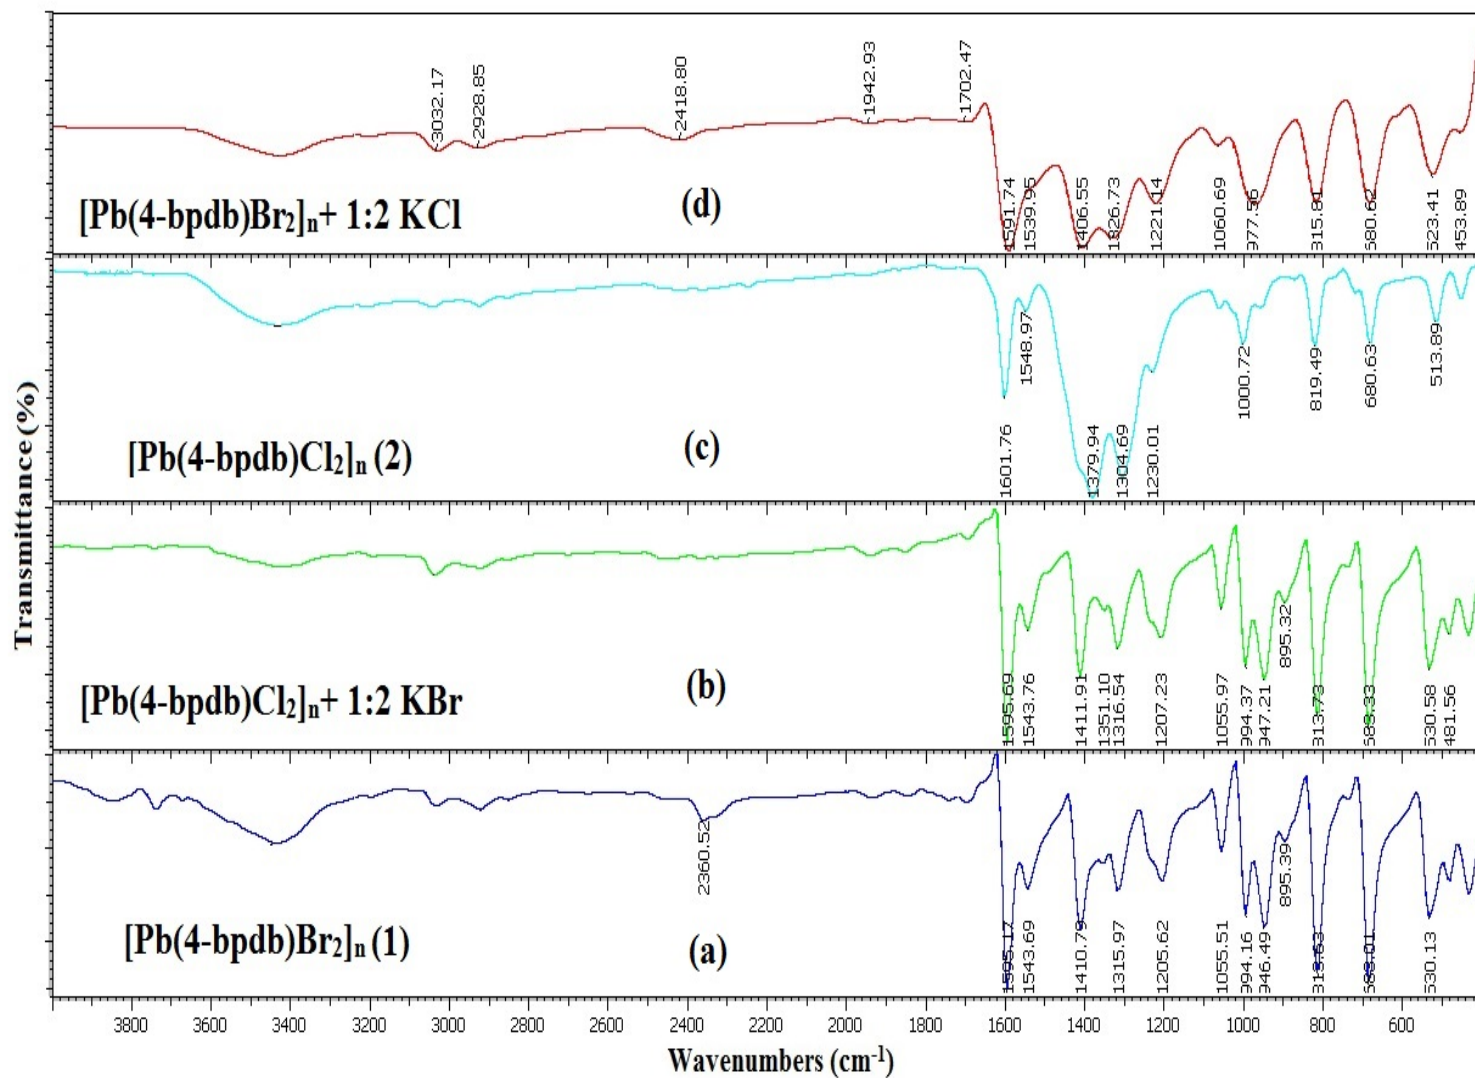

**Fig. S4** IR spectra of (a) compound **1**, (b) bulk materials obtained by solid state anion-replacement of compound **2** by grinding with 2 mmol KBr, (c) compound **2** and (d) bulk materials obtained by solid state anion-replacement of compound **1** by grinding with 2 mmol KCl.

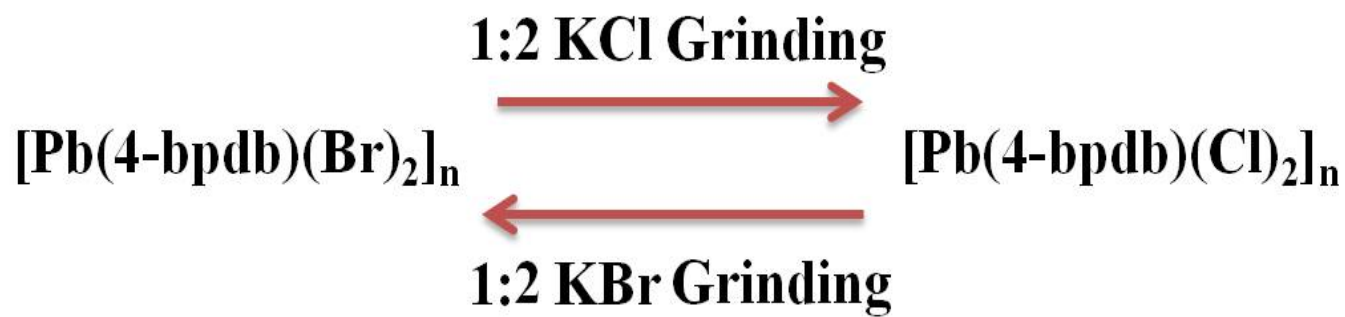

**Fig. S5** schematic diagram for these Solid State structural transformation.

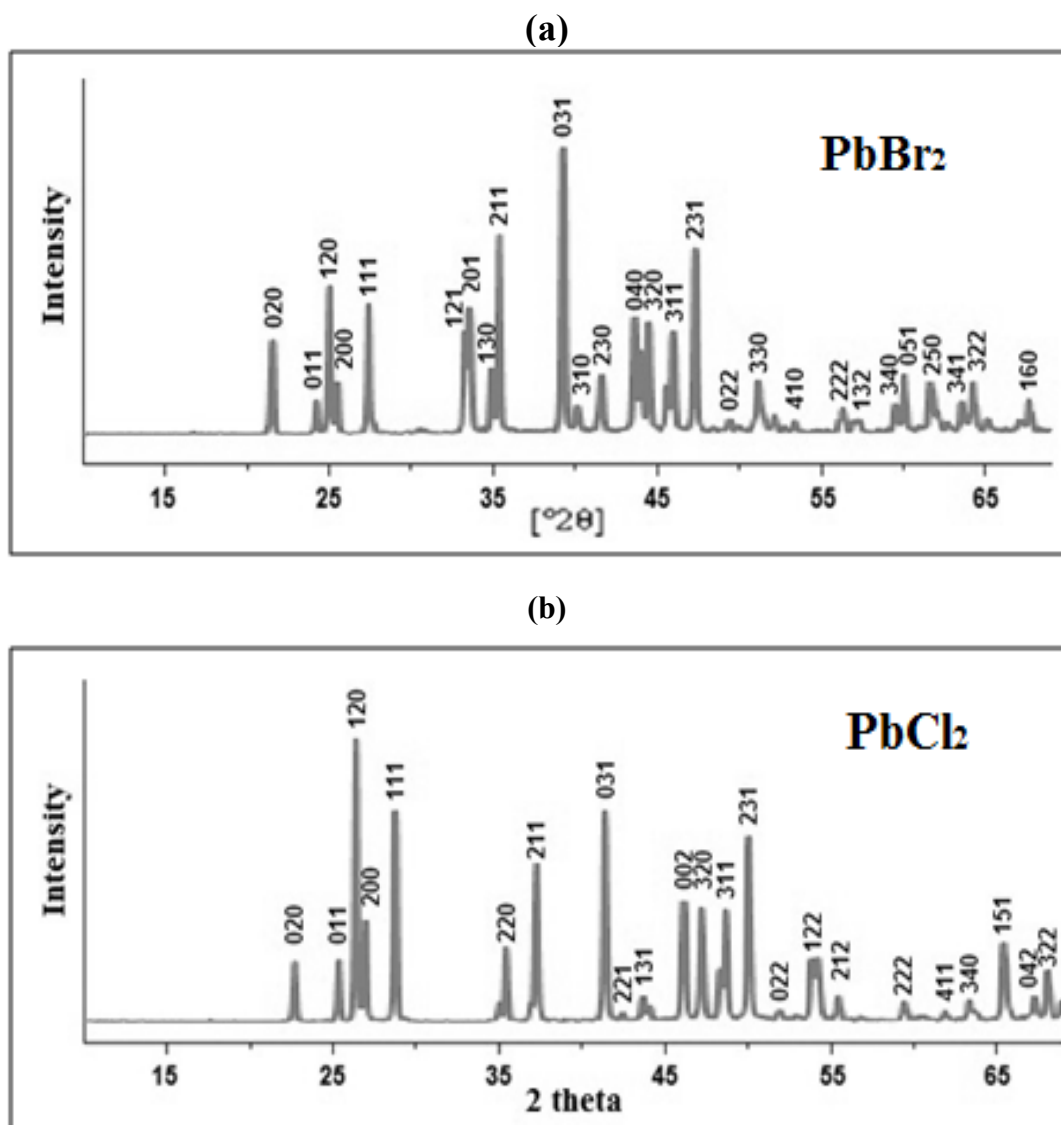

**Fig. S6** XRD patterns of (a) PbBr<sub>2</sub> and (b) PbCl<sub>2</sub> nanoparticles prepared by thermolysis of compounds **1** and **2** in oleic acid at 180 °C under air atmosphere for 2 h, respectively.
